# Supplementary material for: Catalytic pyrolysis of microalga Chlorella pyrenoidosa for production of ethylene, propylene and butene
Source: Royal Society of Chemistry journal article supplement (doi:10.1039/c3ra43850c), 2013-01-01
Supplement: c3ra43850c.pdf [file c3ra43850c.pdf]

## Supplementary Information for

### Catalytic pyrolysis of microalga *Chlorella pyrenoidosa* for production of ethylene, propylene and butene

Xinglong Dong<sup>a,b</sup>, Zhaoan Chen<sup>a</sup>, Song Xue<sup>c</sup>, Jinling Zhang<sup>a</sup>, Jiannan Zhou<sup>c</sup>, Yanan Liu<sup>c</sup>, Yunpeng Xu<sup>\*a</sup>, and Zhongmin Liu<sup>\*a</sup>

<sup>a</sup> National Engineering Laboratory for Methanol to Olefins, Dalian National Laboratory for Clean Energy, Dalian Institute of Chemical Physics, Chinese Academy of Sciences, Dalian 116023, China.

<sup>b</sup> University of Chinese Academy of Sciences, Beijing 100049, China

<sup>c</sup> The Laboratory of Biotechnology, Dalian Institute of Chemical Physics, Chinese Academy of Sciences, Dalian 116023, China

---

\* Corresponding authors: Tel./fax: +86 0411 84379998. E-mail addresses: [liuzm@dicp.ac.cn](mailto:liuzm@dicp.ac.cn) (Z. Liu) [xuyp@dicp.ac.cn](mailto:xuyp@dicp.ac.cn) (Y. Xu)

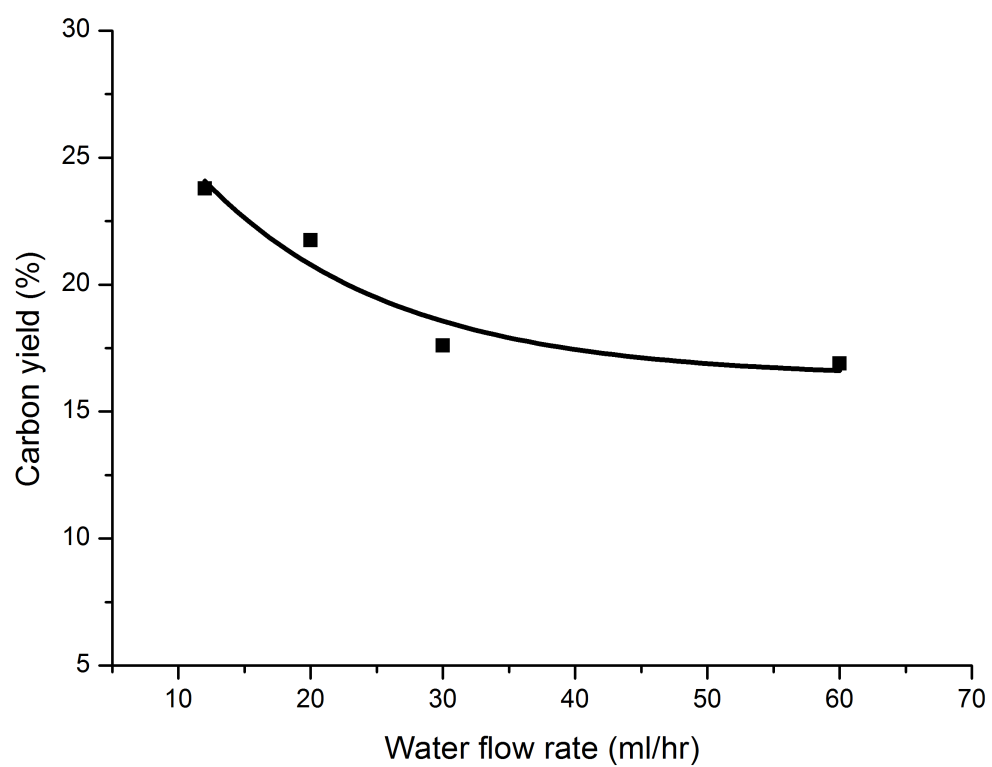

Fig. S1 Effects of water flow rates on carbon yields of biochar (reaction temperature:  
923K).

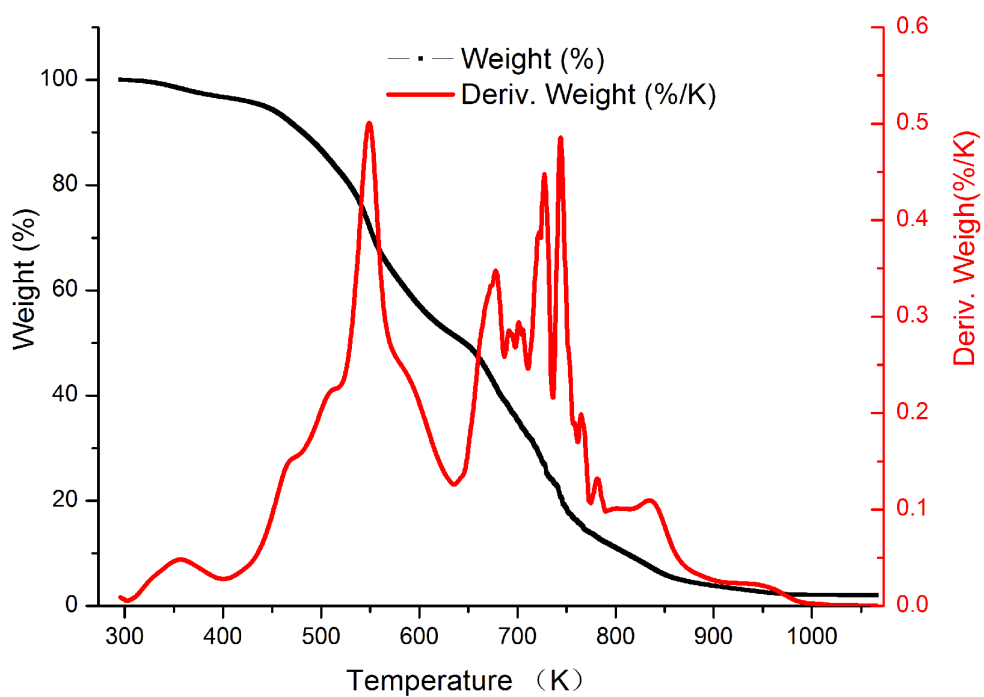

Fig. S2 Thermogravimetric behavior of heterotrophic *C. pyrenoidosa* at the heating rate of 10 K/min under air atmosphere.

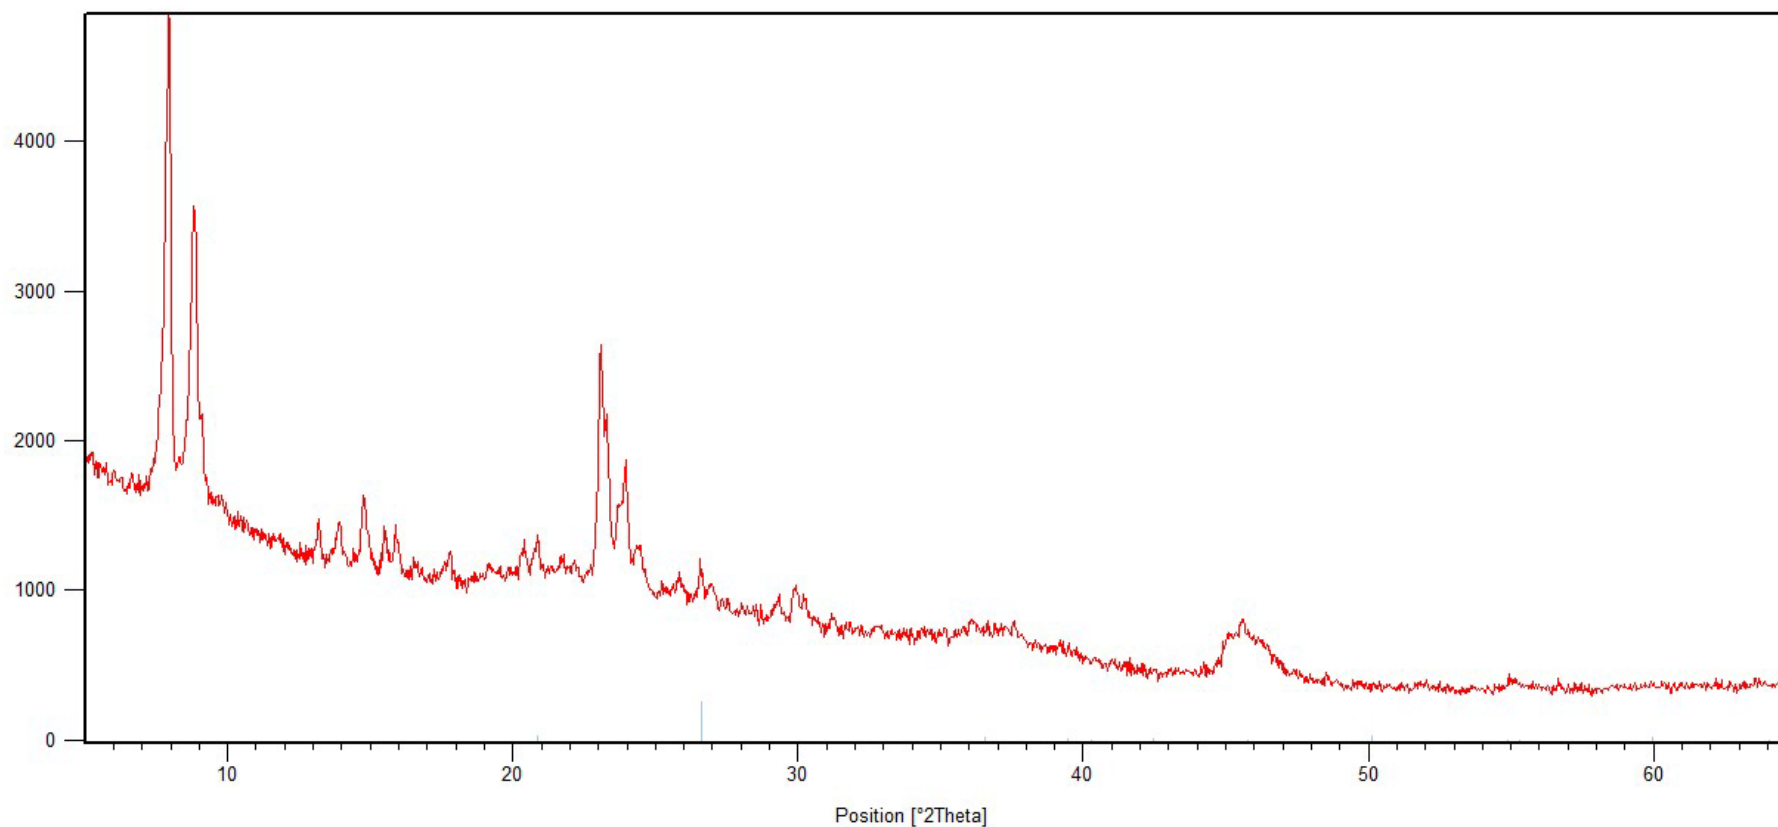

Fig. S3 The modified ZSM-5 zeolite catalyst used in the experiment was examined using X-ray powder diffraction (XRD). The X-ray diffraction pattern was recorded with a PANalytical X'Pert PRO X-ray diffractometer using the Cu-K $\alpha$  radiation ( $\lambda=1.54059\text{\AA}$ ), operating at 40 kV and 40 mA.

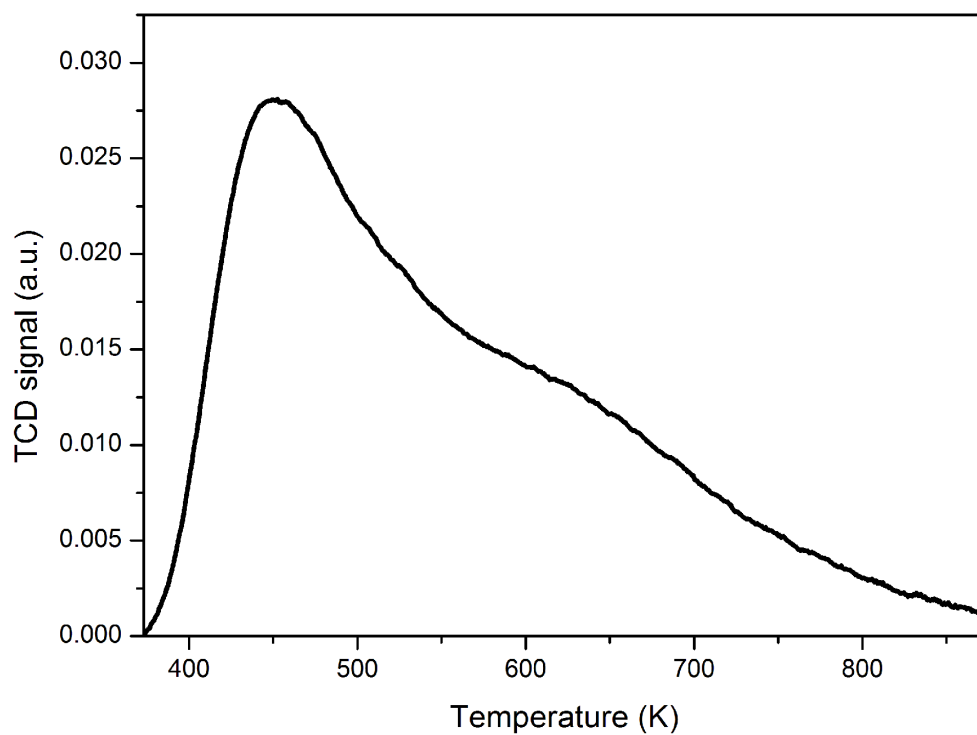

Fig. S4 Temperature programmed desorption of ammonia of the modified ZSM-5 catalyst.

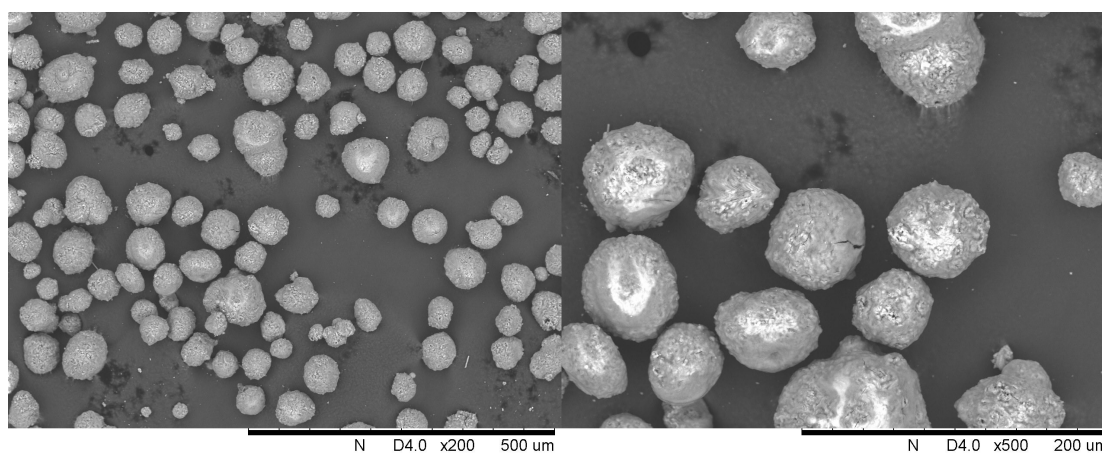

Fig. S5 SEM photos of the modified ZSM-5 catalyst.

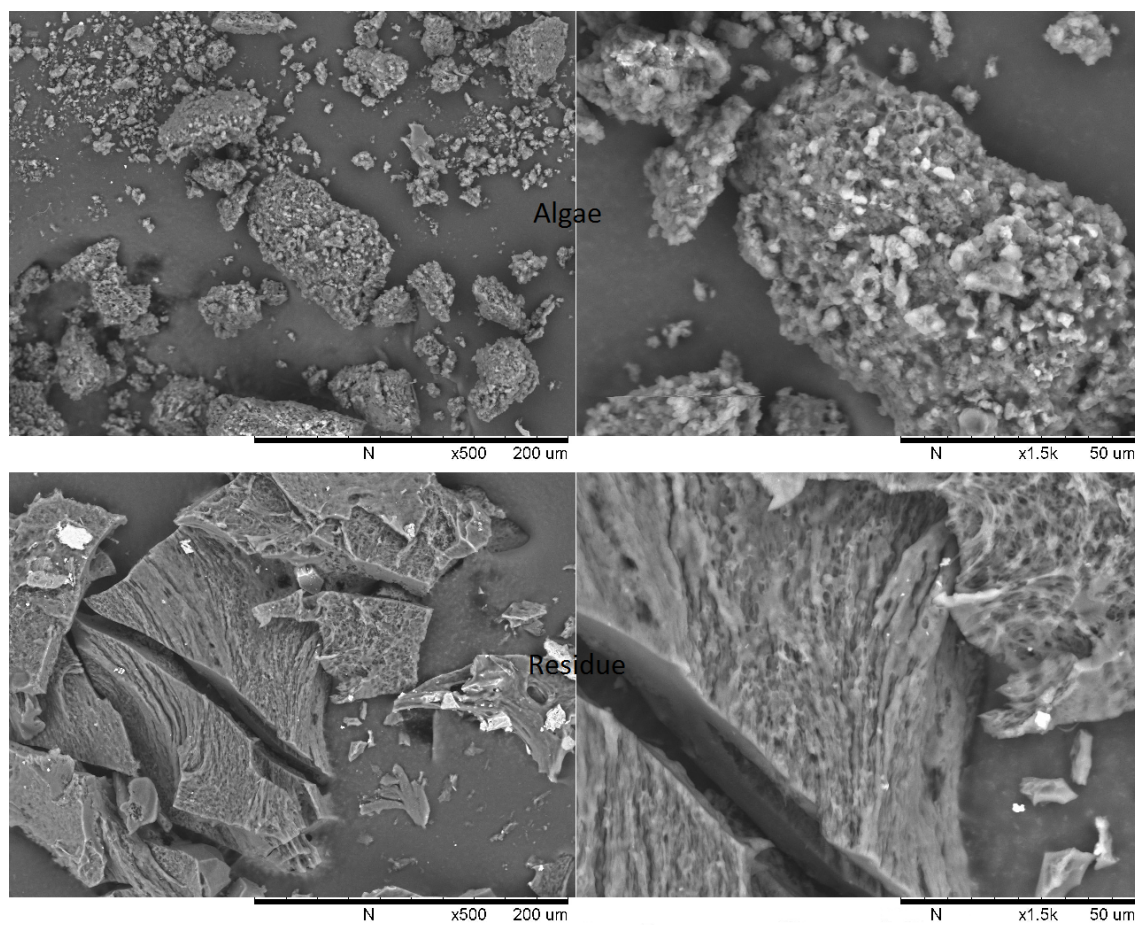

Fig. S6 SEM photos of algae and residue (catalytic pyrolysis).

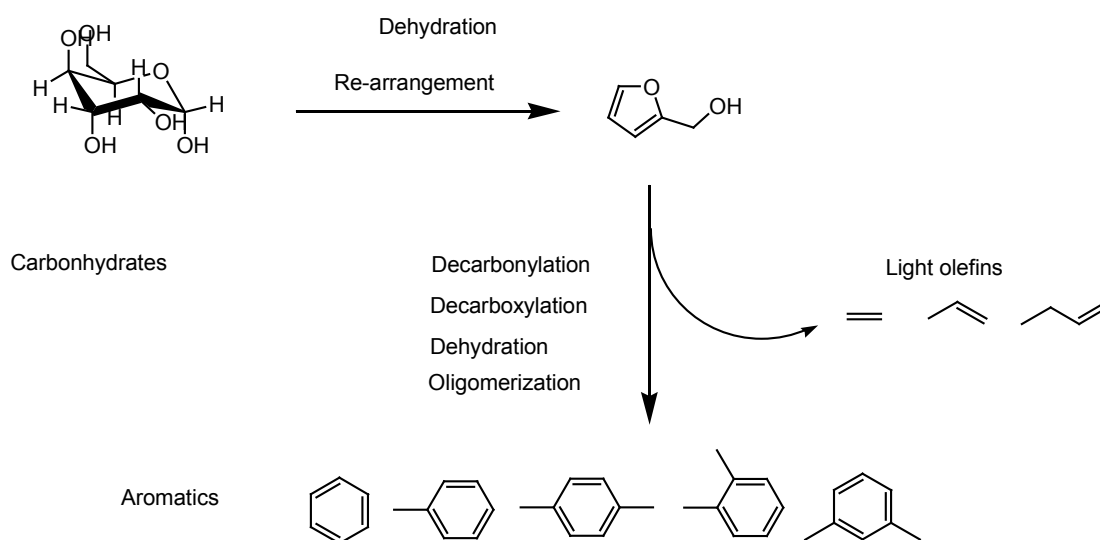

Scheme. S1 Postulated pathways for catalytic pyrolysis of carbohydrates.

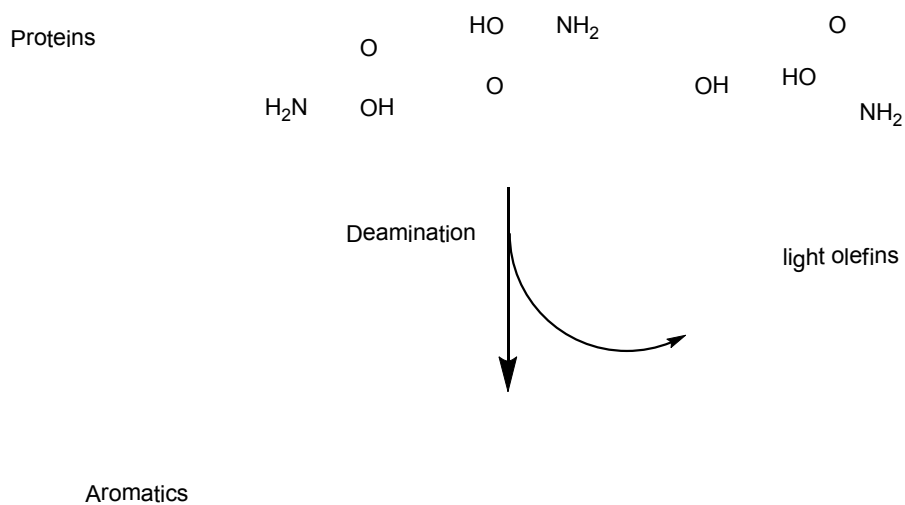

Scheme. S2 Postulated pathways for catalytic pyrolysis of proteins.

Table S1 Compositions (wt %) of liquid products from one-step process and two-step process (reaction atmosphere: steam).

| RT /min | Compounds                    | Structural formula                                                                  | Compositions / wt %           |                               |
|---------|------------------------------|-------------------------------------------------------------------------------------|-------------------------------|-------------------------------|
|         |                              |                                                                                     | Catalytic cracking (One-Step) | Catalytic cracking (Two-Step) |
| 4.706   | Benzene                      |    | 2.85                          | 10.80                         |
| 5.491   | Pyridine                     |    | 12.27                         | 19.41                         |
| 5.767   | Toluene                      |    | 8.23                          | 18.65                         |
| 6.474   | 2-methyl-Pyridine            |    | 2.71                          | 8.22                          |
| 7.252   | Ethylbenzene                 |   | 3.77                          | 2.24                          |
| 7.394   | Xylene                       |  | 9.39                          | 4.87                          |
| 7.654   | 1-Nonene                     |  | 1.79                          |                               |
| 7.809   | styrene                      |  | 5.48                          | 3.72                          |
| 8.071   | 2-methyl-2-Cyclopenten-1-one |  | 1.21                          |                               |
| 9.014   | Propyl-Benzene               |  | 1.60                          |                               |
| 9.194   | 1-ethyl-2-methyl-Benzene     |  | 6.06                          | -                             |
| 9.298   | Phenol                       |  | 3.10                          | 4.60                          |
| 9.473   | Aniline                      |  |                               | 1.99                          |
| 9.602   | 1-Decene                     |  | 2.16                          |                               |



|       |                            |                                                                                     |      |      |
|-------|----------------------------|-------------------------------------------------------------------------------------|------|------|
| 9.806 | Mesitylene                 | 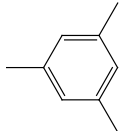   | 4.59 | 1.20 |
| 9.879 | 1-ethenyl-3-methyl-benzene |    | 1.78 |      |
| 10.68 | Indane                     |    | 1.22 |      |
| 10.85 | Indene                     |    | 1.90 | 2.08 |
| 10.96 | 1-methyl-3-propyl-benzene  |    | 3.42 |      |
| 11.14 | p-Cresol                   |    | 2.58 | 1.50 |
| 11.48 | 1-Undecene                 |    | 1.26 |      |
| 11.50 | 1-ethenyl-3-ethyl-Benzene  |   | 1.43 |      |
| 12.73 | 1-methyl-1H-Indene         |  | 5.20 | 1.15 |
| 12.79 | 1,2-dihydro-Naphthalene    |  | 1.32 | 1.53 |
| 13.16 | 1-Dodecene                 |  | 1.05 |      |
| 13.33 | Naphthalene                |  | 1.71 | 3.24 |
| 14.17 | Quinoline                  |  | 1.58 | 2.92 |
| 14.43 | 2,3-dimethyl-1H-Indene     |  | 1.03 |      |
| 14.87 | Indole                     |  | 1.88 | 4.47 |
| 14.99 | 2-methyl-Naphthalene       |  | 2.33 | 4.65 |
| 15.99 | 1-Tetradecene              |  | 0.66 |      |

|       |                          |                                                                                   |      |      |
|-------|--------------------------|-----------------------------------------------------------------------------------|------|------|
| 16.47 | 2,6-dimethyl-Naphthalene | 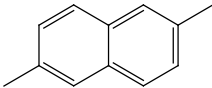 | 0.94 | 2.77 |
| 17.32 | Pentadecane              |  | 2.02 |      |
| 24.99 | Hexadecanenitrile        |  | 1.48 |      |

Table S2 Mass yields (wt %) of products from catalytic pyrolysis of lipid-rich heterotrophic *C. pyrenoidosa*.

| Compounds                         | One-Step |       | Two-Step |
|-----------------------------------|----------|-------|----------|
|                                   | Nitrogen | Steam | Steam    |
| H <sub>2</sub>                    | 0.4      | 0.1   | 1.4      |
| CO                                | 4.8      | 7.7   | 16.2     |
| CO <sub>2</sub>                   | 10.8     | 41.1  | 15.1     |
| CH <sub>4</sub>                   | 1.9      | 1.2   | 4.3      |
| C <sub>2</sub> H <sub>6</sub>     | 1.3      | 0.5   | 1.0      |
| C <sub>2</sub> H <sub>4</sub>     | 1.2      | 0.8   | 4.6      |
| C <sub>3</sub> H <sub>8</sub>     | 1.2      | 0.3   | 0.5      |
| C <sub>3</sub> H <sub>6</sub>     | 2.2      | 3.2   | 10.1     |
| i-C <sub>4</sub> H <sub>10</sub>  | 0.1      | 0.1   | 0.1      |
| n-C <sub>4</sub> H <sub>10</sub>  | 0.3      | 0.1   | 0.2      |
| t-2-C <sub>4</sub> H <sub>8</sub> | 0.4      | 0.6   | 1.3      |
| n-C <sub>4</sub> H <sub>8</sub>   | 0.3      | 0.4   | 1.0      |
| i-C <sub>4</sub> H <sub>8</sub>   | 0.6      | 1.3   | 1.9      |
| c-2-C <sub>4</sub> H <sub>8</sub> | 0.3      | 0.4   | 0.9      |
| C <sub>5</sub>                    | 2.0      | 0.0   | 0.0      |
| C <sub>6</sub> +                  | 0.1      | 2.0   | 2.0      |
| Total olefins                     | 4.8      | 6.7   | 19.7     |
| Total gaseous products            | 27.8     | 60.0  | 60.3     |

Table S3 Effects of reaction temperatures on mass yields (wt %) of gaseous products from catalytic pyrolysis of lipid-rich heterotrophic *C. pyrenoidosa* (water flow rate: 30ml/hr).

| Compounds                         | Temperature (K) |      |      |      |
|-----------------------------------|-----------------|------|------|------|
|                                   | 773             | 873  | 923  | 973  |
| H <sub>2</sub>                    | 0.4             | 0.8  | 1.4  | 1.2  |
| CO                                | 7.3             | 10.1 | 16.2 | 12.6 |
| CO <sub>2</sub>                   | 14.6            | 13.3 | 15.1 | 16.5 |
| CH <sub>4</sub>                   | 1.3             | 2.6  | 4.3  | 4.1  |
| C <sub>2</sub> H <sub>6</sub>     | 0.5             | 0.9  | 1.0  | 0.9  |
| C <sub>2</sub> H <sub>4</sub>     | 3.1             | 4.2  | 4.6  | 4.9  |
| C <sub>3</sub> H <sub>8</sub>     | 0.3             | 0.5  | 0.5  | 0.5  |
| C <sub>3</sub> H <sub>6</sub>     | 6.6             | 9.7  | 10.1 | 9.9  |
| i-C <sub>4</sub> H <sub>10</sub>  | 0.1             | 0.1  | 0.1  | 0.1  |
| n-C <sub>4</sub> H <sub>10</sub>  | 0.1             | 0.2  | 0.2  | 0.2  |
| t-2-C <sub>4</sub> H <sub>8</sub> | 0.9             | 1.1  | 1.3  | 0.9  |
| n-C <sub>4</sub> H <sub>8</sub>   | 0.7             | 1.1  | 1.0  | 1.0  |
| i-C <sub>4</sub> H <sub>8</sub>   | 1.6             | 2.0  | 1.9  | 1.5  |
| c-2-C <sub>4</sub> H <sub>8</sub> | 0.6             | 0.8  | 0.9  | 0.7  |
| C <sub>5</sub>                    | 0.0             | 0.0  | 0.0  | 0.0  |
| C <sub>6</sub> +                  | 1.6             | 1.6  | 2.0  | 2.0  |
| Total olefins                     | 13.5            | 19.0 | 19.7 | 18.8 |
| Total gaseous products            | 39.6            | 49.1 | 60.3 | 56.8 |

Table S4 Effects of water flow rates on mass yields (wt %) of gaseous products from catalytic pyrolysis of lipid-rich heterotrophic *C. pyrenoidosa* (reaction temperature: 923 K).

| Compounds                         | Water flow rate (ml/hr) |      |      |      |
|-----------------------------------|-------------------------|------|------|------|
|                                   | 12                      | 20   | 30   | 60   |
| H <sub>2</sub>                    | 1.5                     | 1.3  | 1.4  | 1.2  |
| CO                                | 12.7                    | 13.2 | 16.2 | 10.3 |
| CO <sub>2</sub>                   | 9.6                     | 10.9 | 15.1 | 9.8  |
| CH <sub>4</sub>                   | 3.9                     | 4.7  | 4.3  | 2.8  |
| C <sub>2</sub> H <sub>6</sub>     | 0.8                     | 1.0  | 1.0  | 0.6  |
| C <sub>2</sub> H <sub>4</sub>     | 3.4                     | 4.1  | 4.6  | 2.4  |
| C <sub>3</sub> H <sub>8</sub>     | 0.4                     | 0.5  | 0.5  | 0.3  |
| C <sub>3</sub> H <sub>6</sub>     | 6.9                     | 8.4  | 10.1 | 6.1  |
| i-C <sub>4</sub> H <sub>10</sub>  | 0.0                     | 0.1  | 0.1  | 0.0  |
| n-C <sub>4</sub> H <sub>10</sub>  | 0.1                     | 0.2  | 0.2  | 0.1  |
| t-2-C <sub>4</sub> H <sub>8</sub> | 0.7                     | 0.8  | 1.3  | 0.8  |
| n-C <sub>4</sub> H <sub>8</sub>   | 0.5                     | 0.6  | 1.0  | 0.7  |
| i-C <sub>4</sub> H <sub>8</sub>   | 1.1                     | 1.3  | 1.9  | 1.2  |
| c-2-C <sub>4</sub> H <sub>8</sub> | 0.5                     | 0.6  | 0.9  | 0.6  |
| C <sub>5</sub>                    | 0.0                     | 0.0  | 0.0  | 0.0  |
| C <sub>6</sub> +                  | 0.5                     | 0.2  | 2.0  | 1.8  |
| Total olefins                     | 13.0                    | 15.8 | 19.7 | 11.8 |
| Total gaseous products            | 42.5                    | 47.8 | 60.3 | 38.7 |
